# Supplementary material for: Syntheses, structures and magnetic properties of cobalt(ii) and nickel(ii) complexes based on 5-methylisophthalate and different dipyridyl-containing ligands
Source: Royal Society of Chemistry journal article supplement (doi:10.1039/c1ce05177f), 2011-01-01
Supplement: c1ce05177f.pdf [file c1ce05177f.pdf]

## Electronic Supplementary Information for

# Syntheses, structures and magnetic properties of cobalt(II) and nickel(II) complexes based on 5-methylisophthalate and different pyridyl-containing ligands

Lu-Fang Ma,<sup>a</sup> Xiu-Qin Li,<sup>a,c</sup> Bin-Liu<sup>b</sup>, Li-Ya Wang<sup>a\*</sup> and Hong-Wei Hou<sup>c\*</sup>

<sup>a</sup> College of Chemistry and Chemical Engineering, Luoyang Normal University, Luoyang 471022, China

<sup>b</sup> Key Laboratory of Synthetic and Natural Functional Molecule Chemistry of Ministry of Education,  
Department of Chemistry, Northwest University, Xi'an 710069, P. R. China

<sup>c</sup> Department of Chemistry, Zhengzhou University, Zhengzhou 450052, China

To whom correspondence should be addressed.

E-mail address: wlya@lynu.edu.cn (L.-Y. Wang), Tel./Fax: +86-379-65511205

**Table S1. Selected bond lengths (Å) and angles (°) for 1**

|                     |            |                     |            |
|---------------------|------------|---------------------|------------|
| Co(1)–O(2)#1        | 2.007(3)   | O(1)–Co(1)–N(1)     | 94.81(12)  |
| Co(1)–O(1)          | 2.033(3)   | O(3)#2–Co(1)–N(1)   | 89.72(12)  |
| Co(1)–O(3)#2        | 2.120(3)   | O(2)#1–Co(1)–N(2)#3 | 89.19(13)  |
| Co(1)–N(1)          | 2.176(3)   | O(1)–Co(1)–N(2)#3   | 86.91(12)  |
| Co(1)–N(2)#3        | 2.184(3)   | O(3)#2–Co(1)–N(2)#3 | 88.01(12)  |
| Co(1)–O(4)#2        | 2.262(3)   | N(1)–Co(1)–N(2)#3   | 177.57(14) |
| O(2)#1–Co(1)–O(1)   | 105.50(11) | O(2)#1–Co(1)–O(4)#2 | 158.43(11) |
| O(2)#1–Co(1)–O(3)#2 | 98.56(12)  | O(1)–Co(1)–O(4)#2   | 95.73(11)  |
| O(1)–Co(1)–O(3)#2   | 155.32(11) | O(3)#2–Co(1)–O(4)#2 | 59.96(11)  |
| O(2)#1–Co(1)–N(1)   | 91.99(13)  | N(1)–Co(1)–O(4)#2   | 89.98(12)□ |

Symmetry equivalent atoms: #1  $-x, -y+1, -z+1$ ; #2  $x, y+1, z$ ; #3  $x-1, y, z+1$

**Table S2. Selected bond lengths (Å) and angles (°) for 2**

|              |            |                     |           |
|--------------|------------|---------------------|-----------|
| Co(1)–O(4)#1 | 2.0373(14) | O(3)#2–Co(1)–N(1)   | 91.10(7)  |
| Co(1)–O(3)#2 | 2.0400(15) | O(2)–Co(1)–N(1)     | 90.97(7)  |
| Co(1)–O(2)   | 2.1374(15) | O(4)#1–Co(1)–N(2)#3 | 87.04(7)  |
| Co(1)–N(1)   | 2.1571(19) | O(3)#2–Co(1)–N(2)#3 | 87.19(7)  |
| Co(1)–N(2)#3 | 2.175(2)   | O(2)–Co(1)–N(2)#3   | 93.82(7)  |
| Co(1)–O(1)   | 2.2247(15) | N(1)–Co(1)–N(2)#3   | 174.89(6) |

|                     |           |                   |           |
|---------------------|-----------|-------------------|-----------|
| O(4)#1–Co(1)–O(3)#2 | 115.54(6) | O(4)#1–Co(1)–O(1) | 95.02(6)  |
| O(4)#1–Co(1)–O(2)   | 154.98(6) | O(3)#2–Co(1)–O(1) | 149.02(6) |
| O(3)#2–Co(1)–O(2)   | 89.47(6)  | O(2)–Co(1)–O(1)   | 60.00(6)  |
| O(4)#1–Co(1)–N(1)   | 89.37(7)  | N(1)–Co(1)–O(1)   | 94.34(7)  |

Symmetry equivalent atoms: #1  $x, y+1, z$ ; #2  $-x+1, -y+1, -z+2$ ; #3  $-x+1, -y+2, -z+2$

**Table S3. Selected bond lengths (Å) and angles (°) for 3**

|                     |            |                     |           |
|---------------------|------------|---------------------|-----------|
| Ni(1)–O(4)#1        | 2.0307(12) | O(3)#2–Ni(1)–N(1)   | 91.99(6)  |
| Ni(1)–O(3)#2        | 2.0414(13) | O(2)–Ni(1)–N(1)     | 90.24(6)  |
| Ni(1)–O(2)          | 2.1083(12) | O(4)#1–Ni(1)–N(2)#3 | 87.14(6)  |
| Ni(1)–N(1)          | 2.1157(15) | O(3)#2–Ni(1)–N(2)#3 | 88.35(6)  |
| Ni(1)–N(2)#3        | 2.1197(15) | O(2)–Ni(1)–N(2)#3   | 87.82(5)  |
| Ni(1)–O(1)          | 2.1865(13) | N(1)–Ni(1)–N(2)#3   | 178.06(6) |
| O(4)#1–Ni(1)–O(3)#2 | 100.86(5)  | O(4)#1–Ni(1)–O(1)   | 97.96(5)  |
| O(4)#1–Ni(1)–O(2)   | 159.21(5)  | O(3)#2–Ni(1)–O(1)   | 160.68(5) |
| O(3)#2–Ni(1)–O(2)   | 99.15(5)   | O(2)–Ni(1)–O(1)     | 61.72(5)  |
| O(4)#1–Ni(1)–N(1)   | 94.67(6)   | N(1)–Ni(1)–O(1)     | 90.84(6)  |

Symmetry equivalent atoms: #1  $x, y-1, z$ ; #2  $-x+1, -y+2, -z+1$ ; #3  $x-1, y, z+1$

**Table S4. Selected bond lengths (Å) and angles (°) for 4**

|                     |            |                   |           |
|---------------------|------------|-------------------|-----------|
| Ni(1)–O(4)#1        | 2.0095(12) | O(2)–Ni(1)–N(1)   | 91.20(5)  |
| Ni(1)–O(2)          | 2.0760(11) | N(2)#2–Ni(1)–N(1) | 96.84(5)  |
| Ni(1)–N(2)#2        | 2.0817(14) | O(4)#1–Ni(1)–O(5) | 86.03(6)  |
| Ni(1)–N(1)          | 2.0908(14) | O(2)–Ni(1)–O(5)   | 90.91(5)  |
| Ni(1)–O(5)          | 2.1134(13) | N(2)#2–Ni(1)–O(5) | 91.91(5)  |
| Ni(1)–O(1)          | 2.1949(12) | N(1)–Ni(1)–O(5)   | 170.89(5) |
| O(4)#1–Ni(1)–O(2)   | 161.93(5)  | O(4)#1–Ni(1)–O(1) | 99.92(5)  |
| O(4)#1–Ni(1)–N(2)#2 | 105.20(5)  | O(2)–Ni(1)–O(1)   | 62.08(4)  |
| O(2)–Ni(1)–N(2)#2   | 92.69(5)   | N(2)#2–Ni(1)–O(1) | 154.64(5) |
| O(4)#1–Ni(1)–N(1)   | 89.24(6)   | N(1)–Ni(1)–O(1)   | 86.83(5)  |

Symmetry equivalent atoms: #1  $x-1, y, z$ ; #2  $x, y-1, z+1$

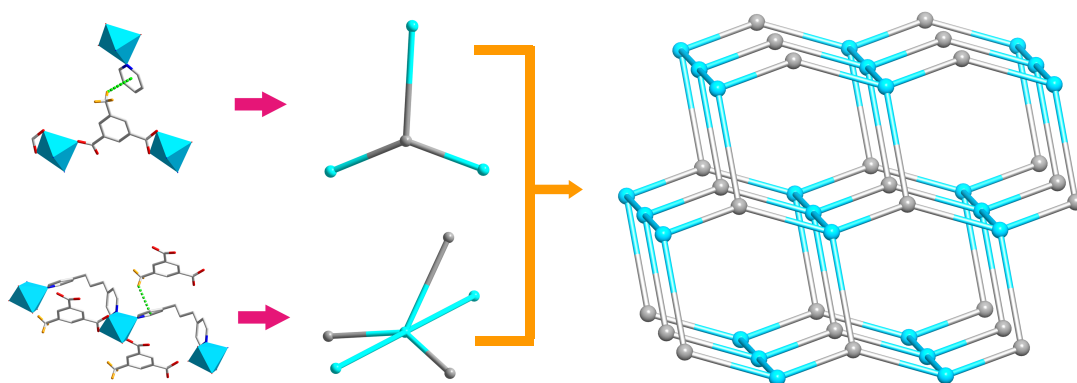

**Fig. S1** Schematic view of the 3D (3,5)-connected framework with the (6<sup>3</sup>)(6<sup>9</sup>.8) topology in **4**.

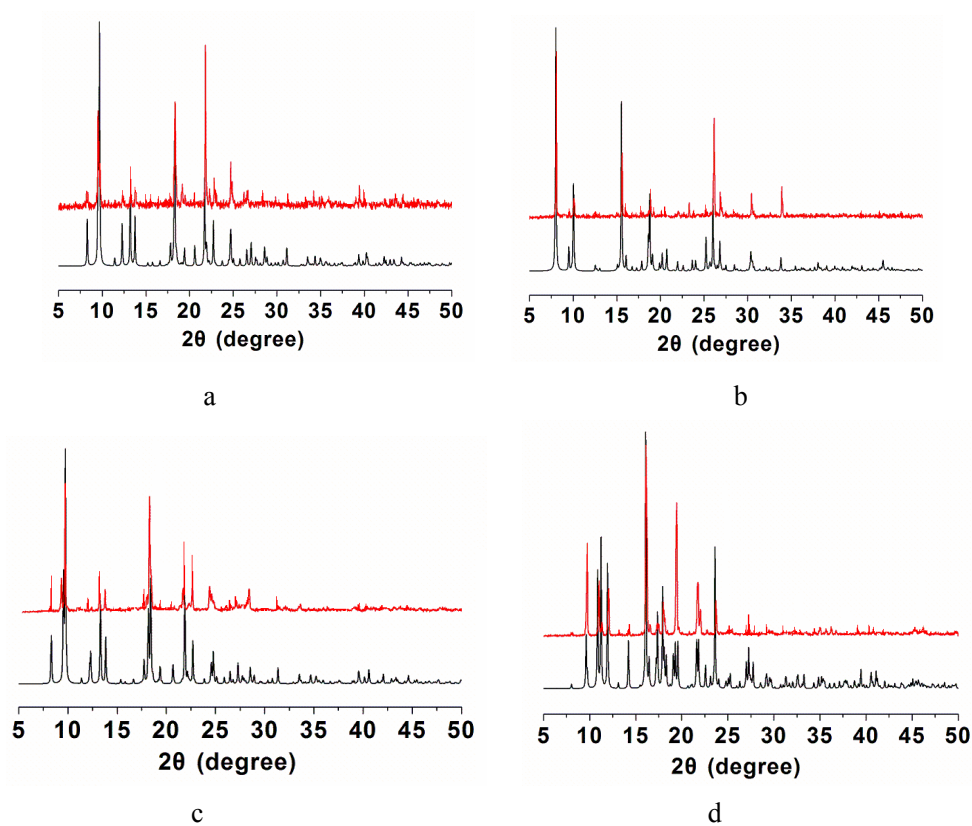

**Fig. S2** XPRD pattern of the single crystal of complexes **1** (a), **2** (b) **3** (c) and **4** (d). Observed XPRD patterns (black); as-synthesized (red).
